# Supplementary material for: Evaluation of fractionally distilled Picea abies TMP-turpentine on wood-decaying fungi: in vitro, microcosm and field experiments
Source: Springer Nature journal article supplement (doi:10.1007/s00226-020-01192-3), 2020-06-03
Supplement: MOESM1 [file 18047874]

## Online Resource 1 - Vacuum distillation of turpentine

| <b>Fraction</b> | <b>Bp (°C) at P mbar</b> | <b>P (mbar)</b> | <b>Bp (°C) at 1010 mbar</b> | <b>Volume (ml)</b> |
|-----------------|--------------------------|-----------------|-----------------------------|--------------------|
| 1               | 20-22                    | 18.6            | 135                         | 0.5                |
| 2               | 39-41                    | 18.6            | 155                         | 100                |
| 3               | 42                       | 18.6            | 160                         | 100                |
| 4               | 42                       | 18.6            | 160                         | 80                 |
| 5               | 42                       | 18.6            | 160                         | 75                 |
| 6               | 42                       | 18.6            | 160                         | 100                |
| 7               | 43                       | 18.6            | 162                         | 35                 |
| 8               | 44                       | 18.6            | 162                         | 70                 |
| 9               | 44-49                    | 16              | 163                         | 55                 |
| 10              | 49-54                    | 16              | 170                         | 71                 |
| 11              | 54                       | 16              | 173                         | 11                 |
| 12              | 54                       | 16              | 173                         | 2                  |
| 13              | 22-28                    | 1.3             | 180                         | 20                 |
| 14              | 19.28                    | 0.8             | 180-200                     | 20                 |
| 15              | 28-53                    | 0.8             | 200-240                     | 17                 |
| 16              | 52-55                    | 0.5             | 280-290                     | 13                 |
| 17              | 55-64                    | 0.5             | 290-300                     | 18                 |
| 18              | 61-74                    | 0.5             | 297-315                     | 26                 |
| 19              | 70-79                    | 0.5             | 308-320                     | 18                 |
| 20              | 79-87                    | 0.5             | 320-335                     | 33                 |
| 21              | 89-95                    | 0.5             | 340-347                     | 23                 |
| 22              | 100-111                  | 0.5             | 350-370                     | 10                 |
| 23              | 111-117                  | 0.5             | 370-380                     | 10                 |
| residue         | >117                     |                 |                             | 92.5               |
